# Supplementary material for: Magnetic copper ferrite nanoparticles/TEMPO catalyzed selective oxidation of activated alcohols to aldehydes under ligand- and base-free conditions in water
Source: Royal Society of Chemistry journal article supplement (doi:10.1039/c4ra14152k), 2014-01-01

## Supporting Information

### **Magnetic Copper Ferrite Nanoparticles/TEMPO Catalyzed Aerobic Oxidation of Aromatic Alcohols to Aldehydes under Ligand- and Base-Free Conditions Using Water as Solvent**

Xiao Zhu,<sup>a</sup> Daoshan Yang,<sup>\*a</sup> Wei Wei,<sup>a</sup> Min Jiang,<sup>b</sup> Lulu Li,<sup>a</sup> Jinmao You,<sup>a</sup> and Hua Wang<sup>\*a</sup>

<sup>a</sup> The Key Laboratory of Life-Organic Analysis and Key Laboratory of Pharmaceutical Intermediates and Analysis of Natural Medicine, School of Chemistry and Chemical Engineering, Qufu Normal University, Qufu 273165, Shandong, China.

<sup>b</sup> Key Laboratory of Bioorganic Phosphorus Chemistry and Chemical Biology (Ministry of Education), Department of Chemistry, Tsinghua University, Beijing 100084, People's Republic of China

\* Fax: +86-5374458306; E-mail: huawang\_qfnu@126.com;  
yangdaoshan@tsinghua.org.cn

### **Table of Contents**

|                                                                                    |    |
|------------------------------------------------------------------------------------|----|
| The EDX spectrum of native CuFe <sub>2</sub> O <sub>4</sub> catalyst.....          | P2 |
| The <sup>1</sup> H and <sup>13</sup> C NMR spectra of compounds <b>2a-2n</b> ..... | P3 |

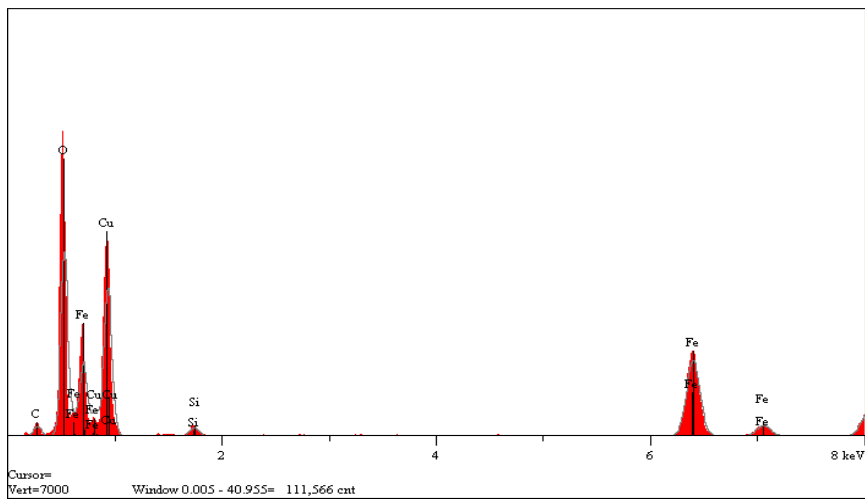

**Fig. 1** The EDX spectrum of native  $\text{CuFe}_2\text{O}_4$  catalyst

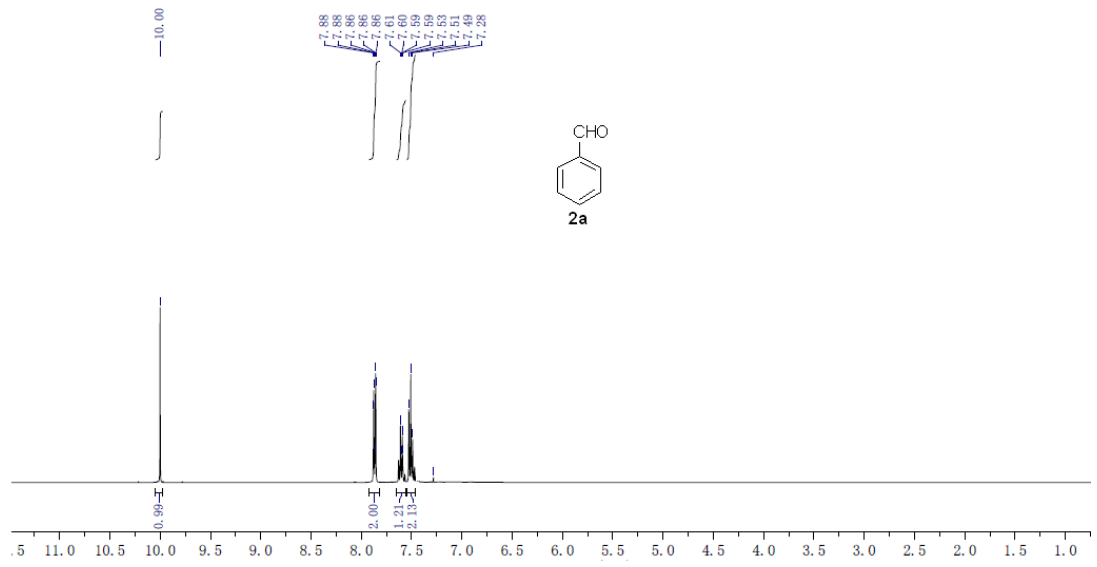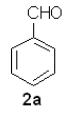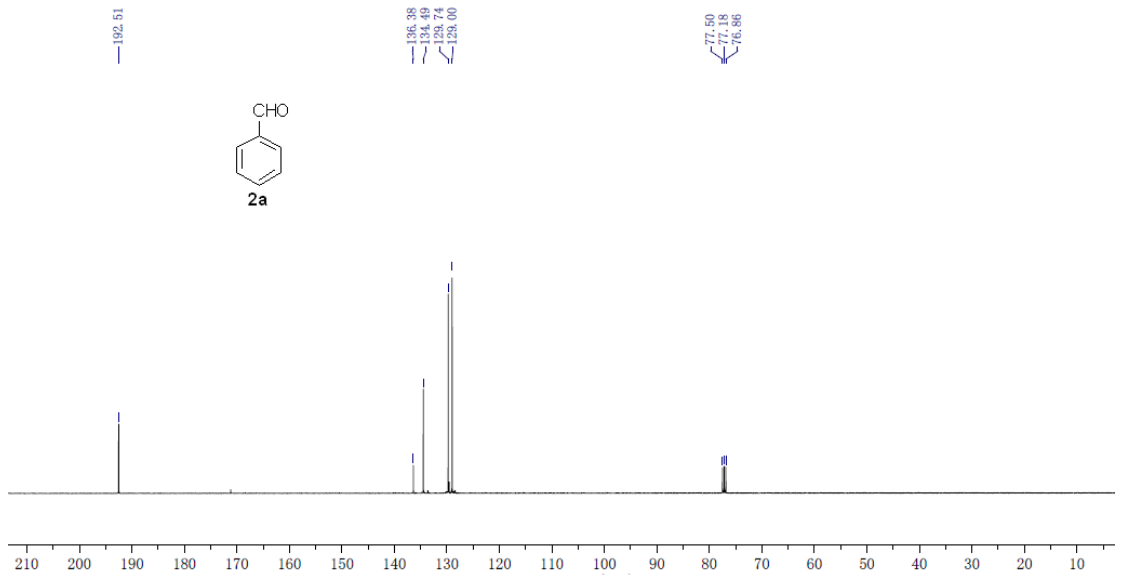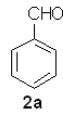

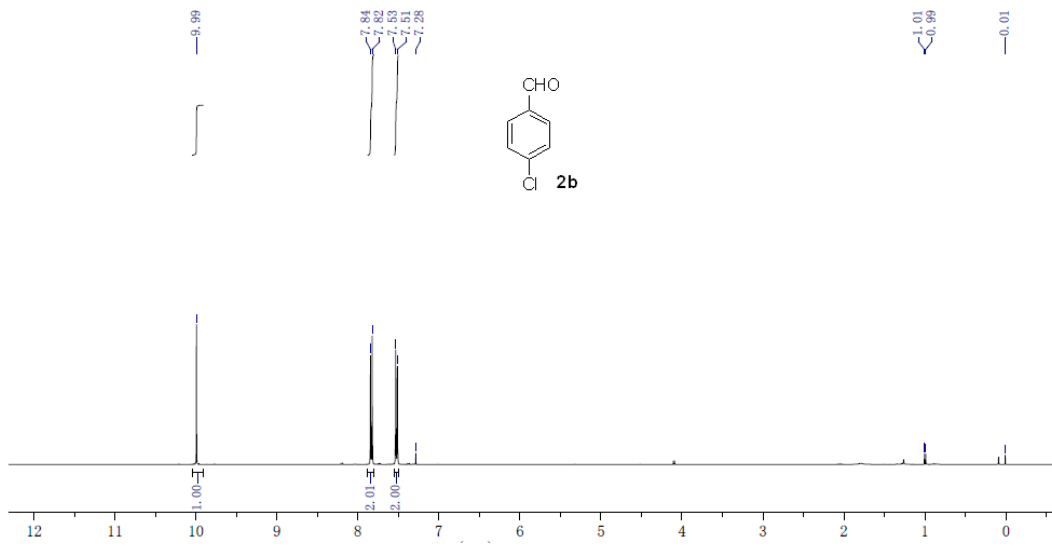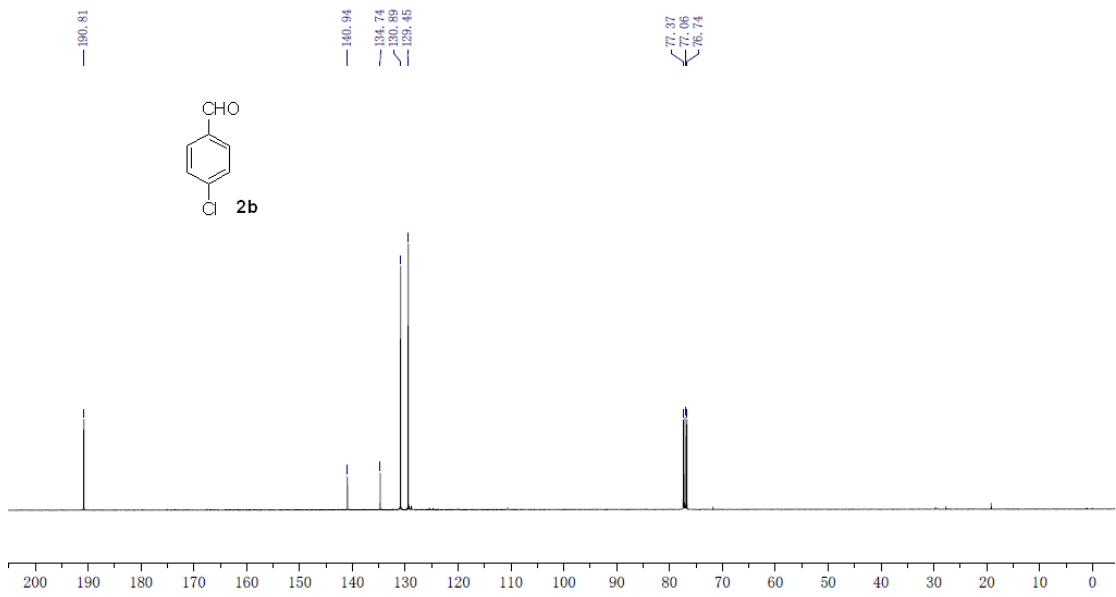

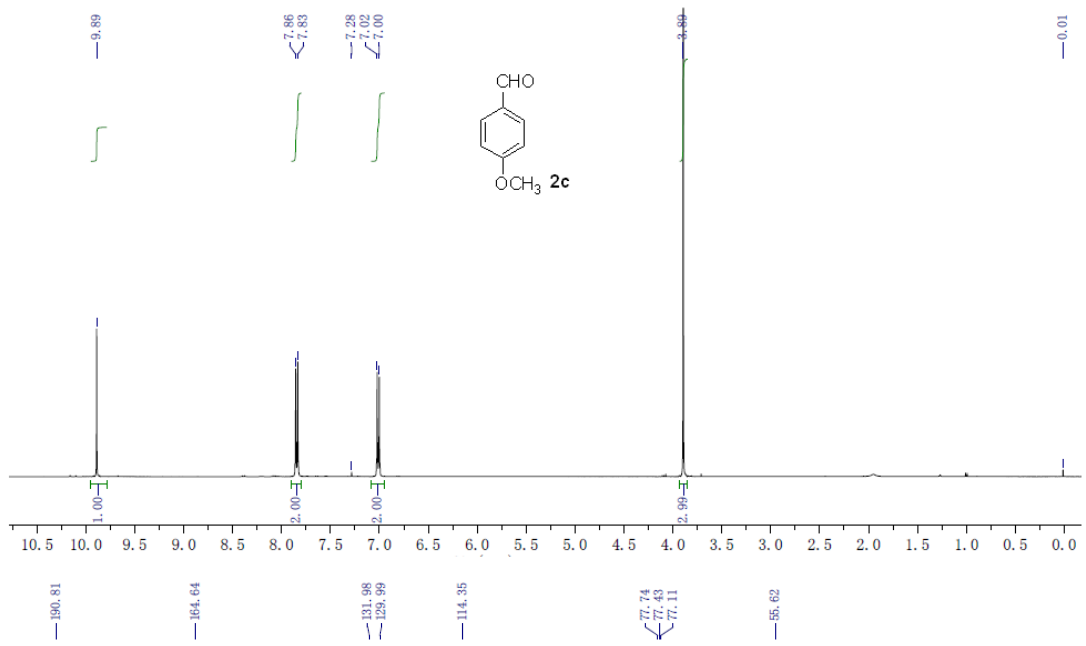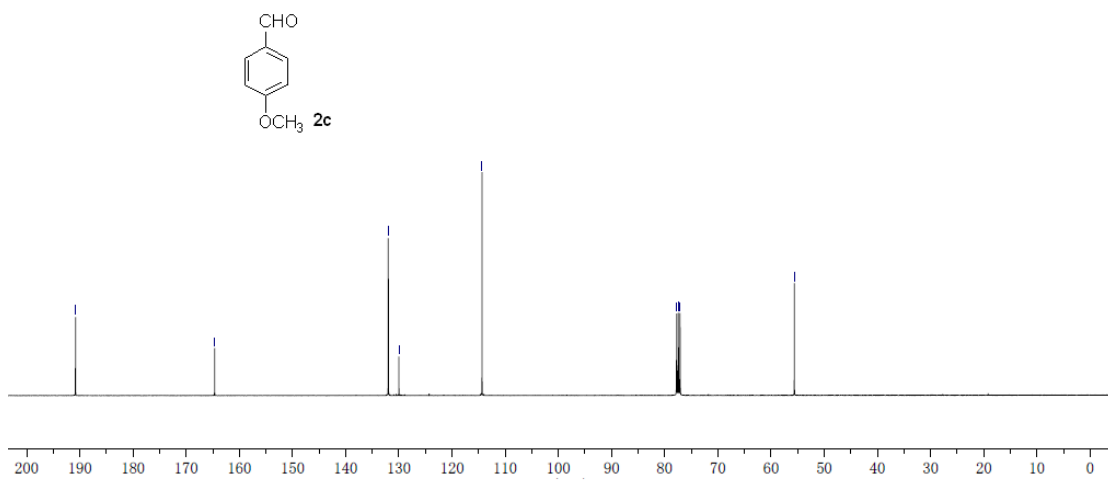

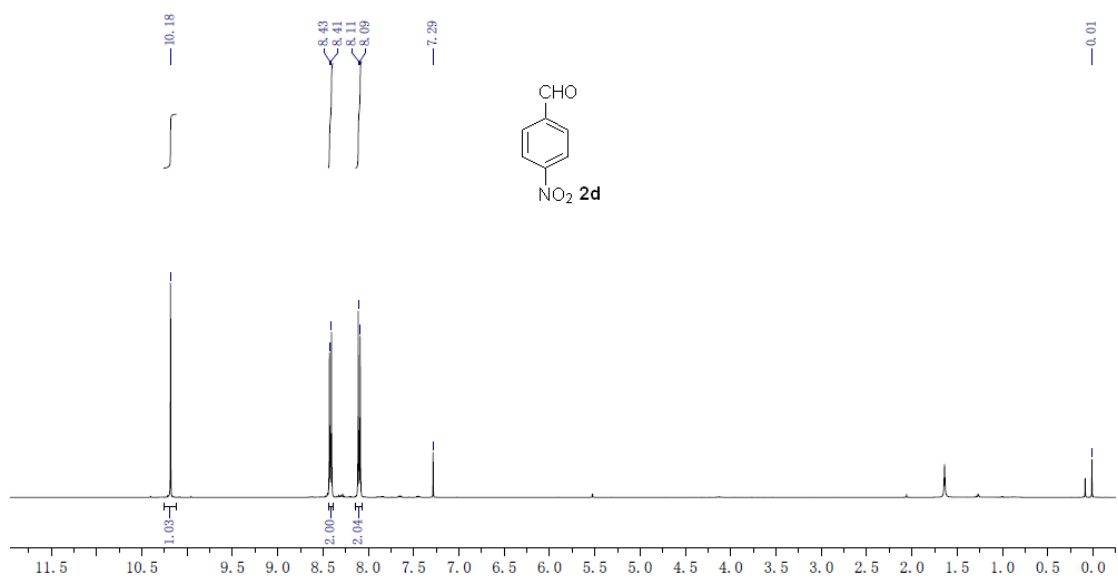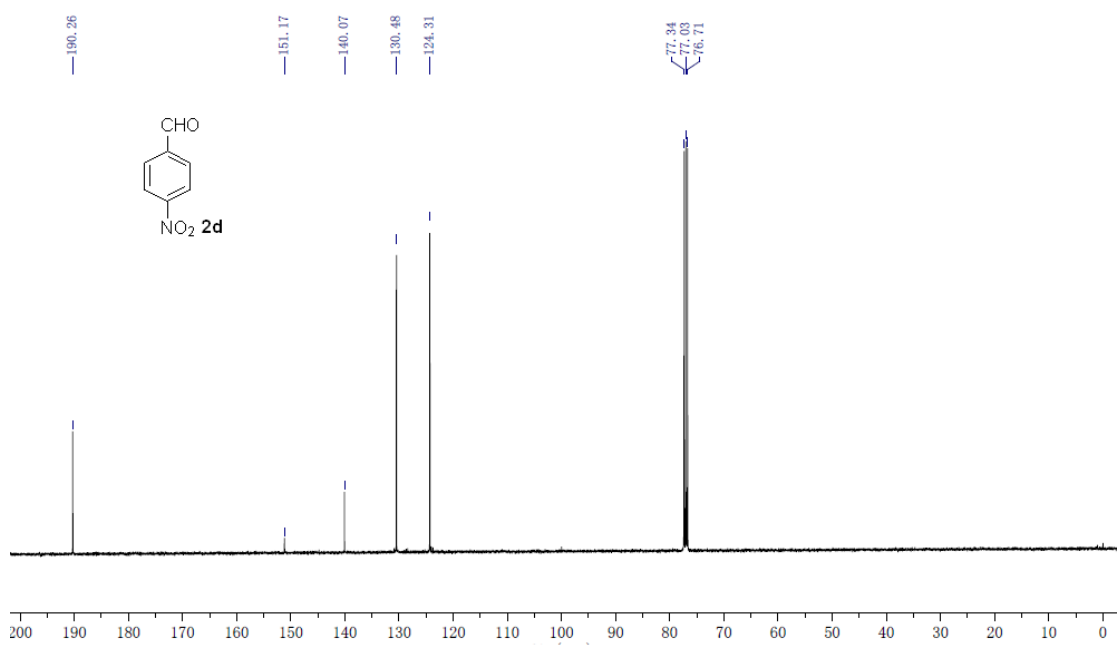

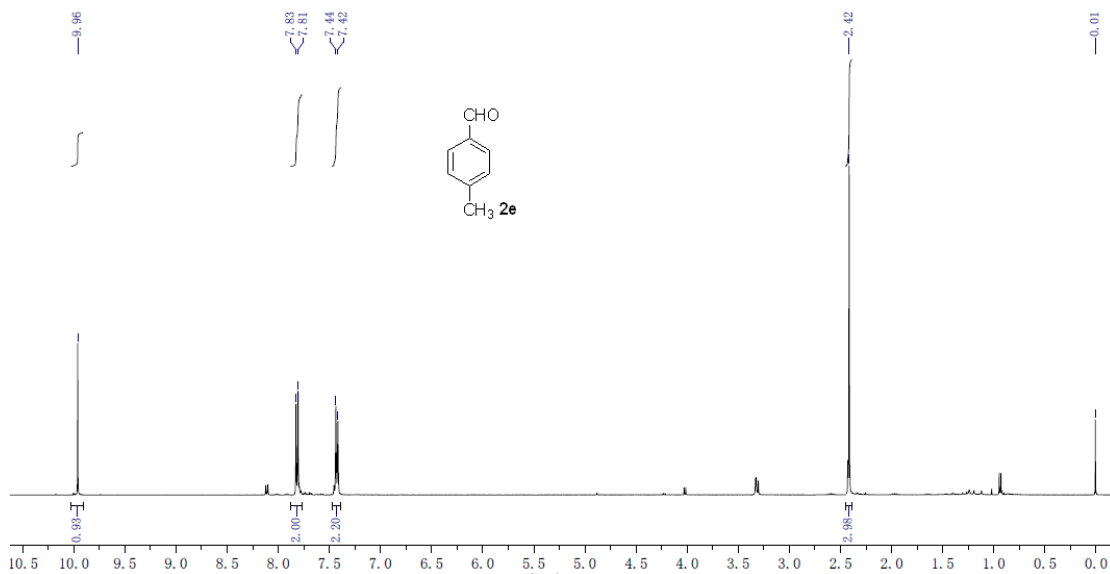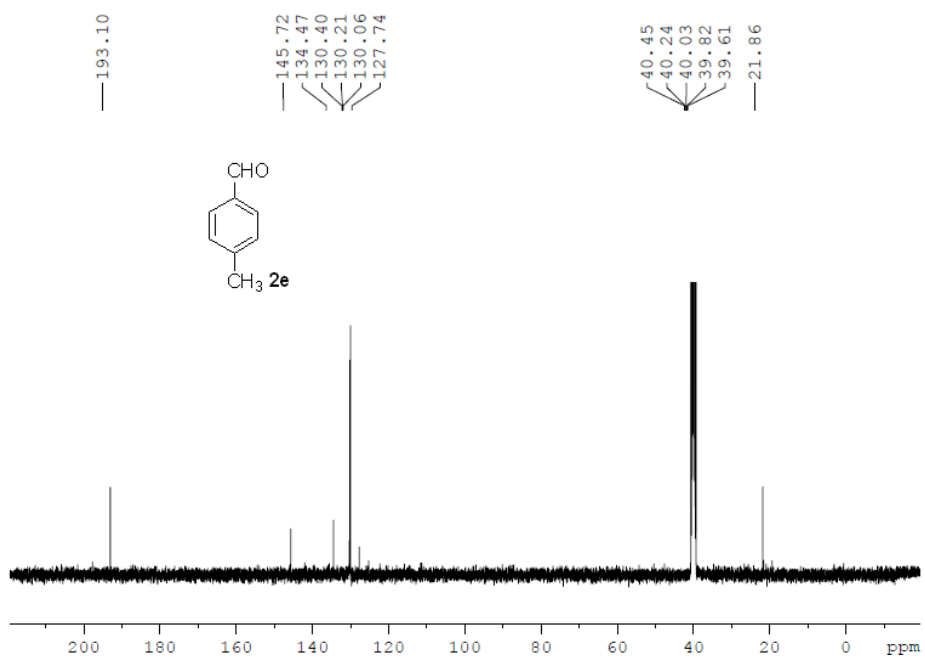

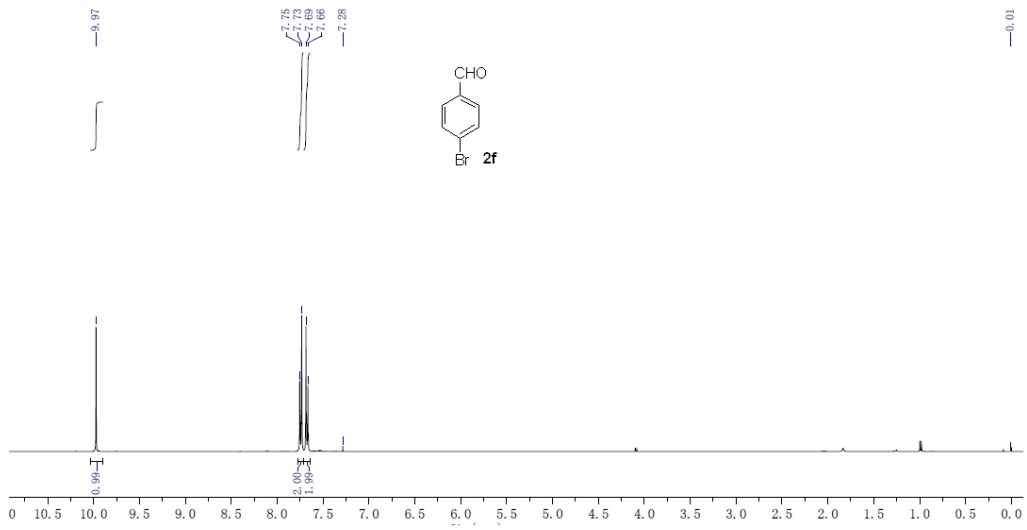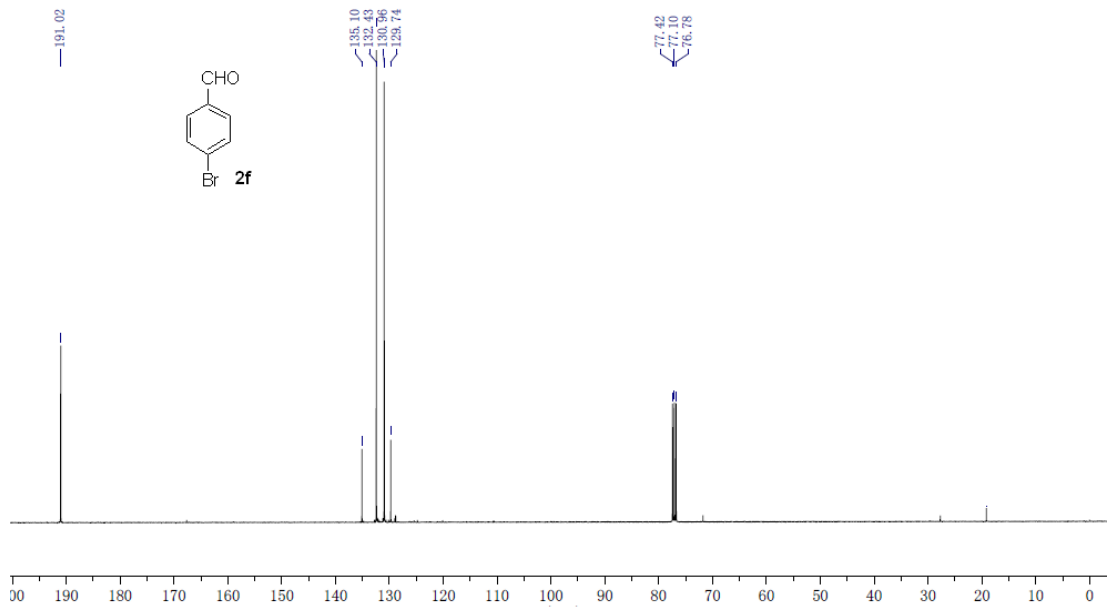



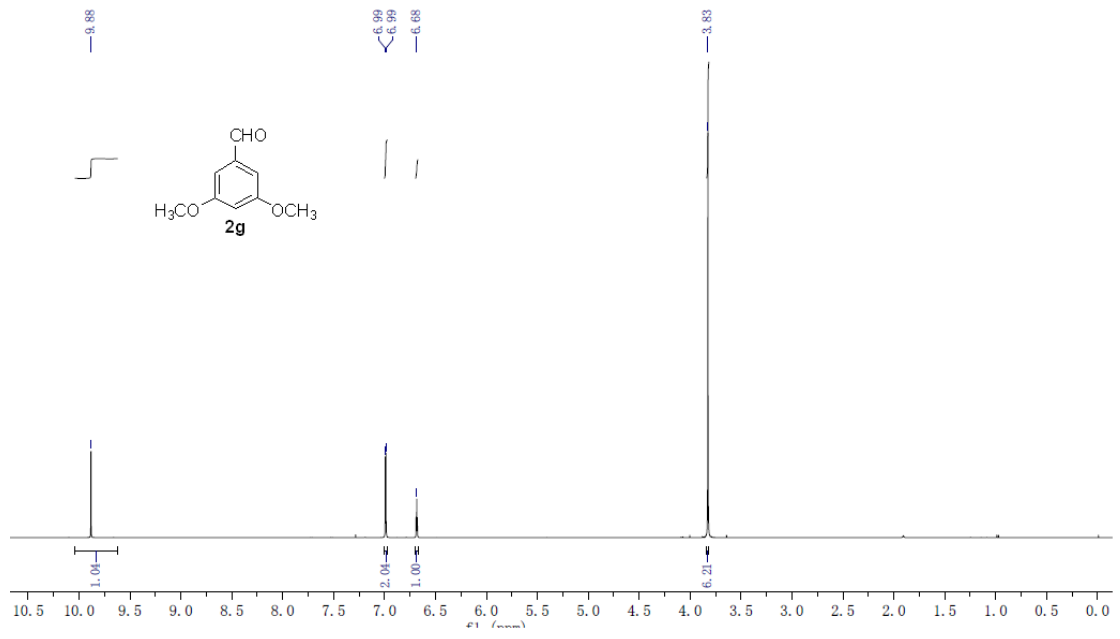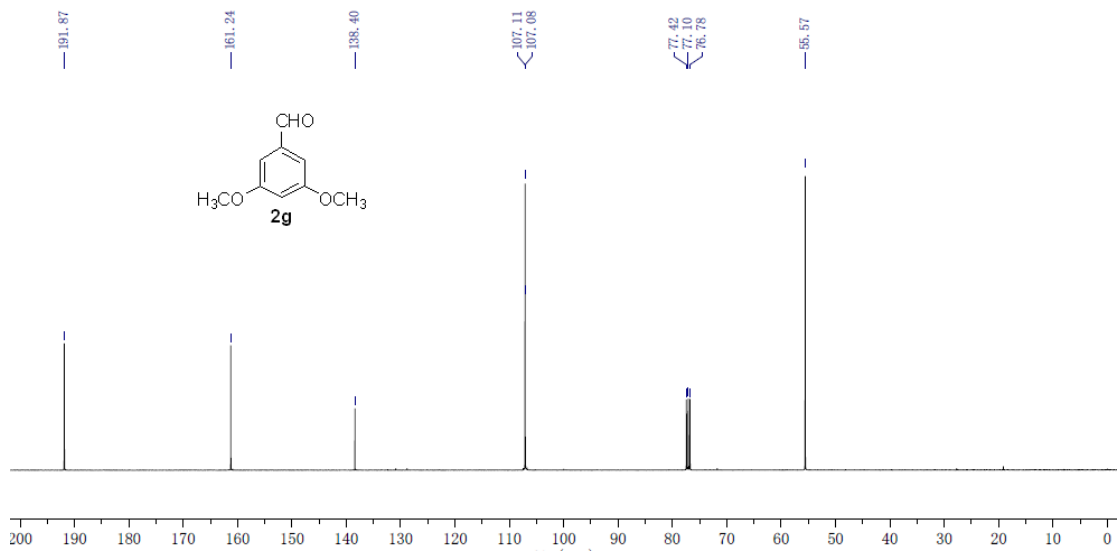

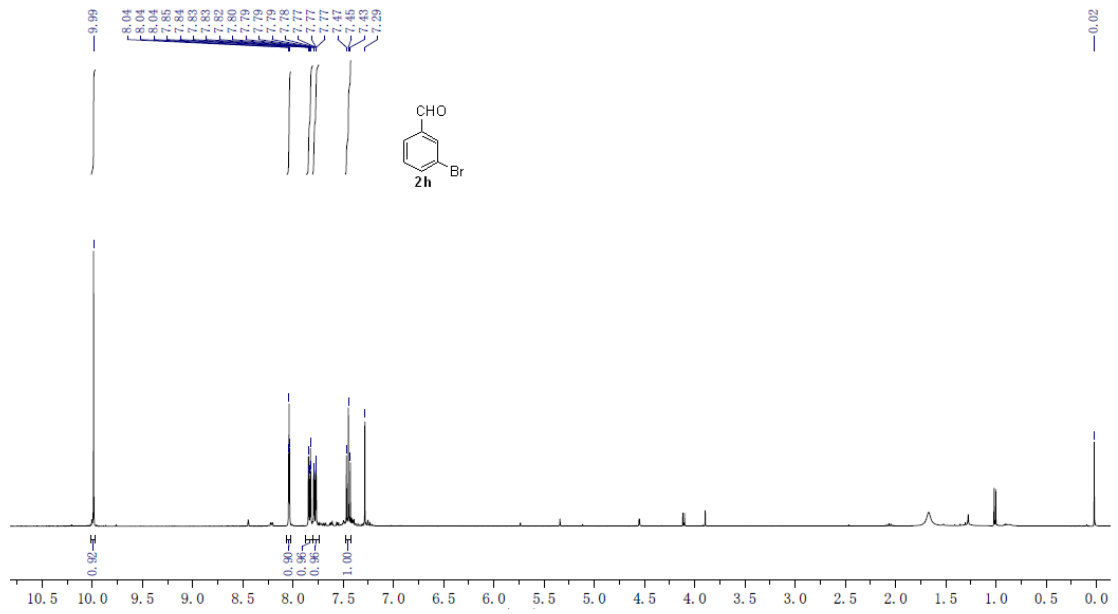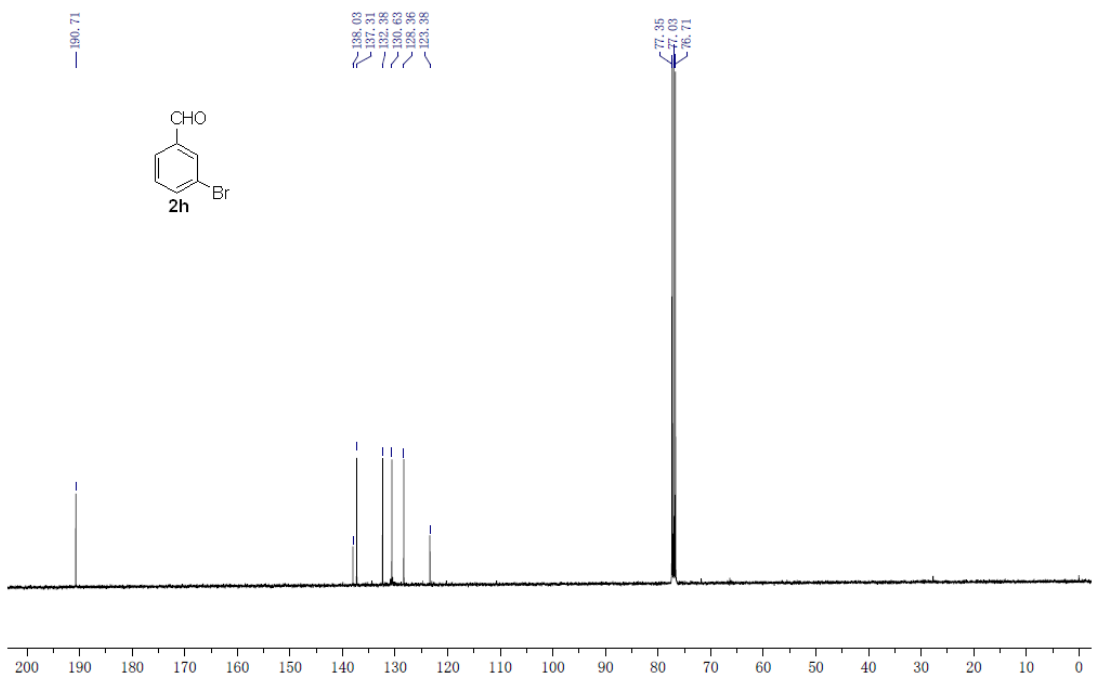



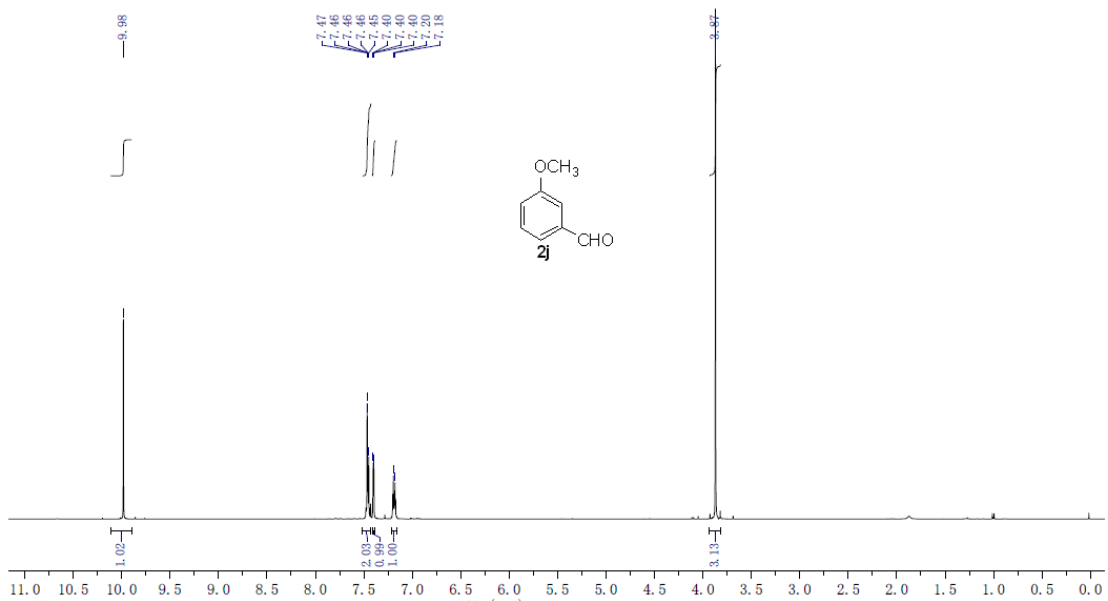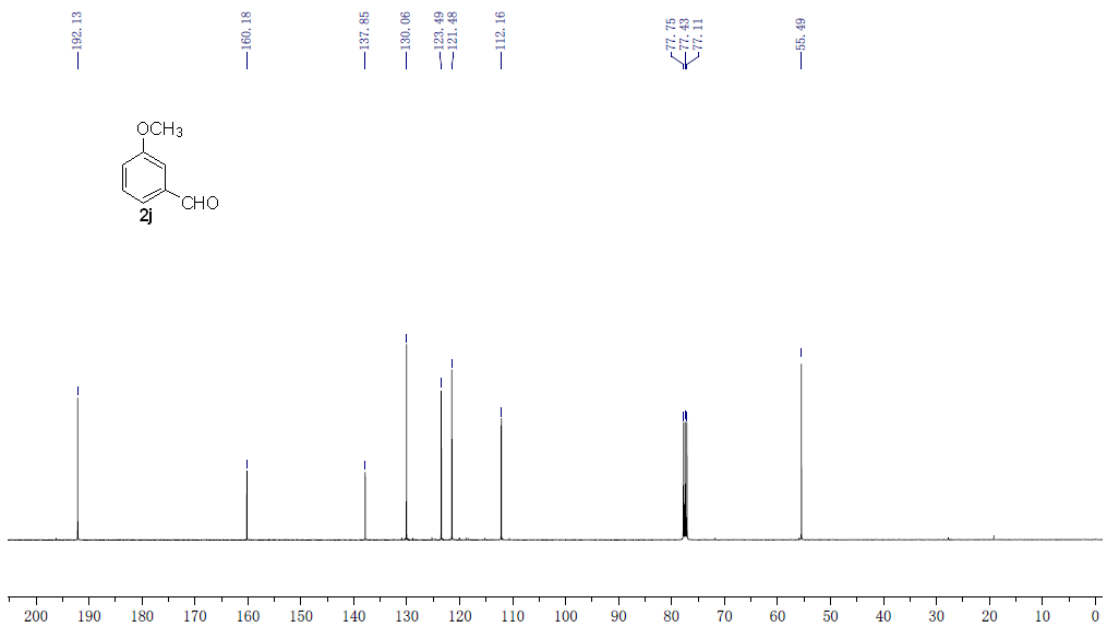



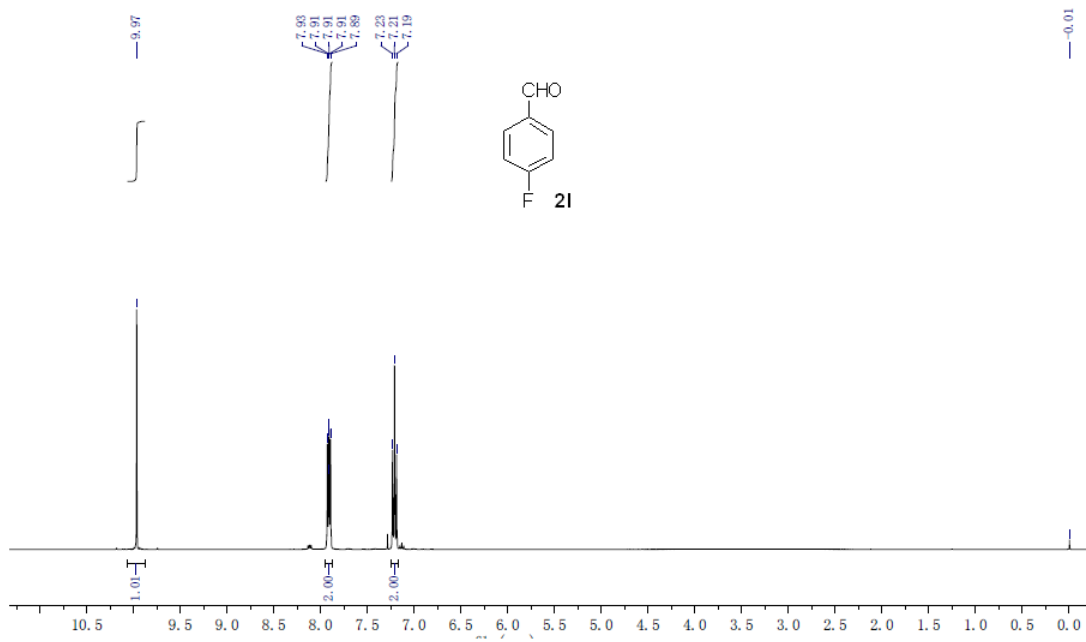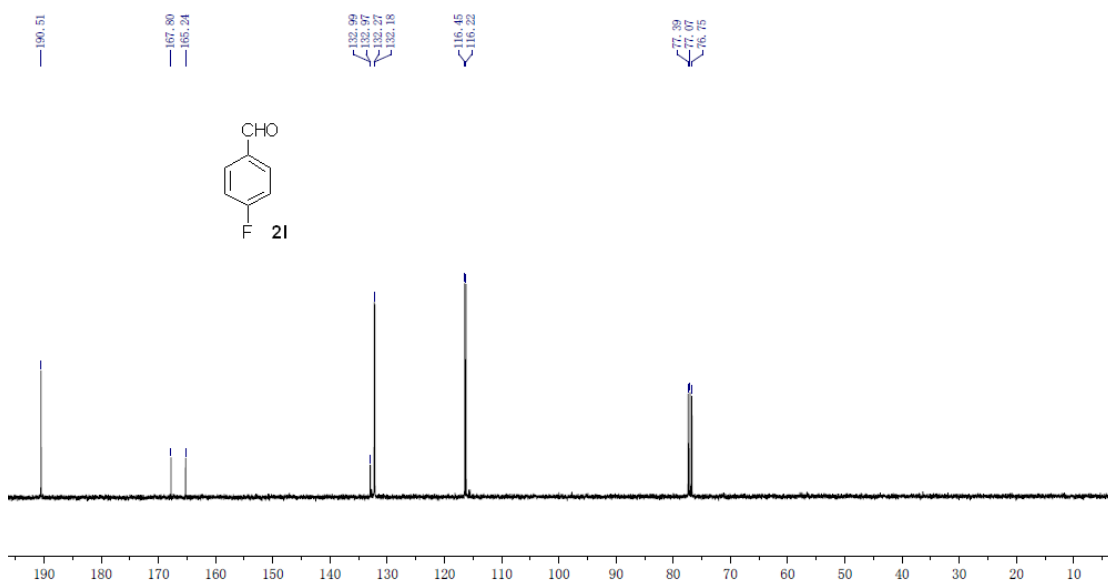

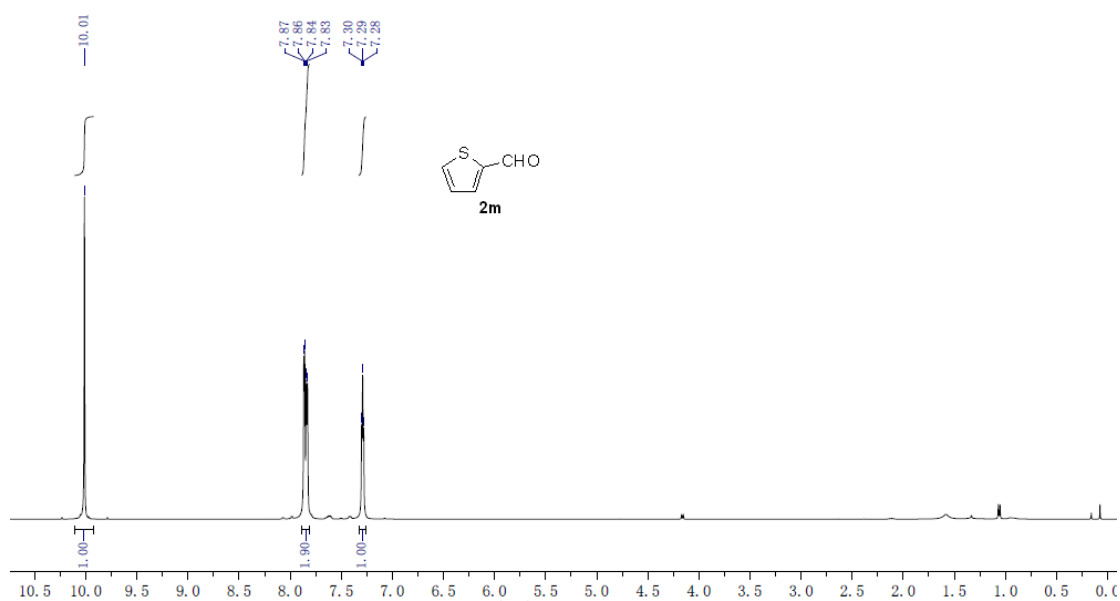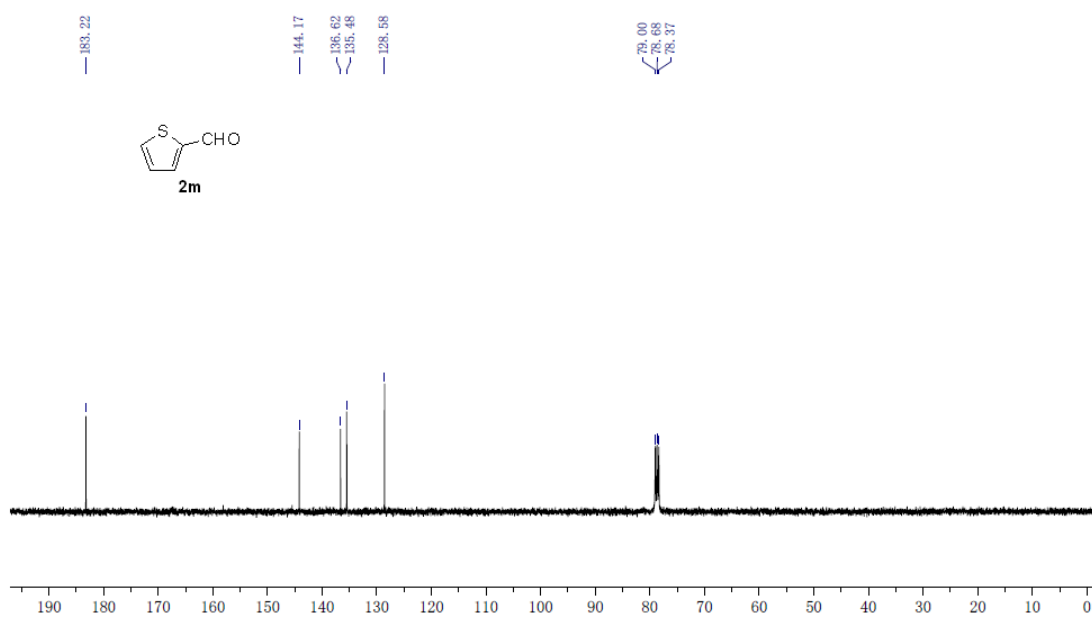

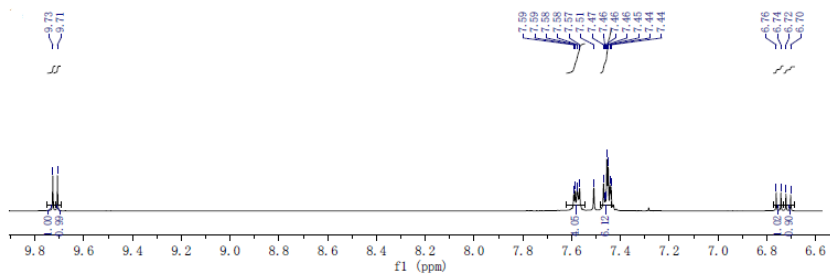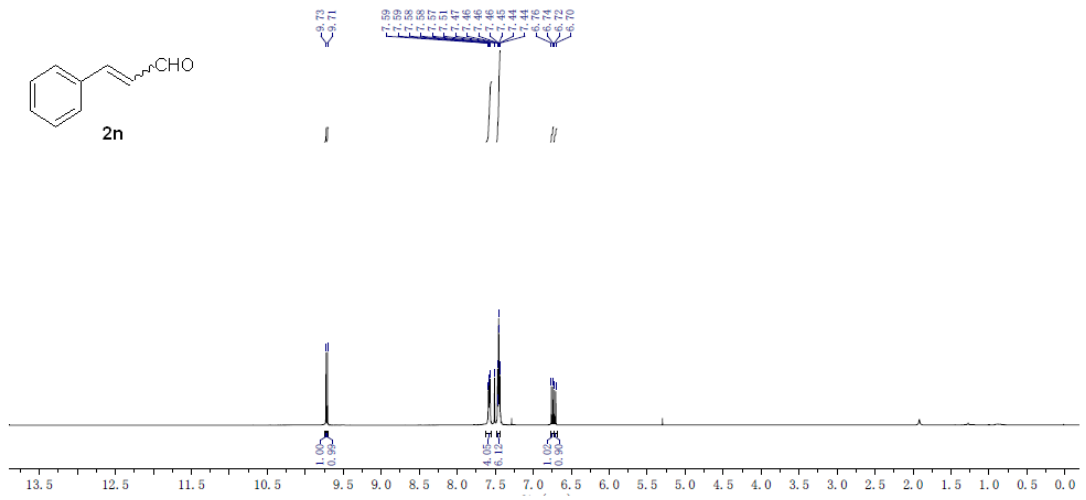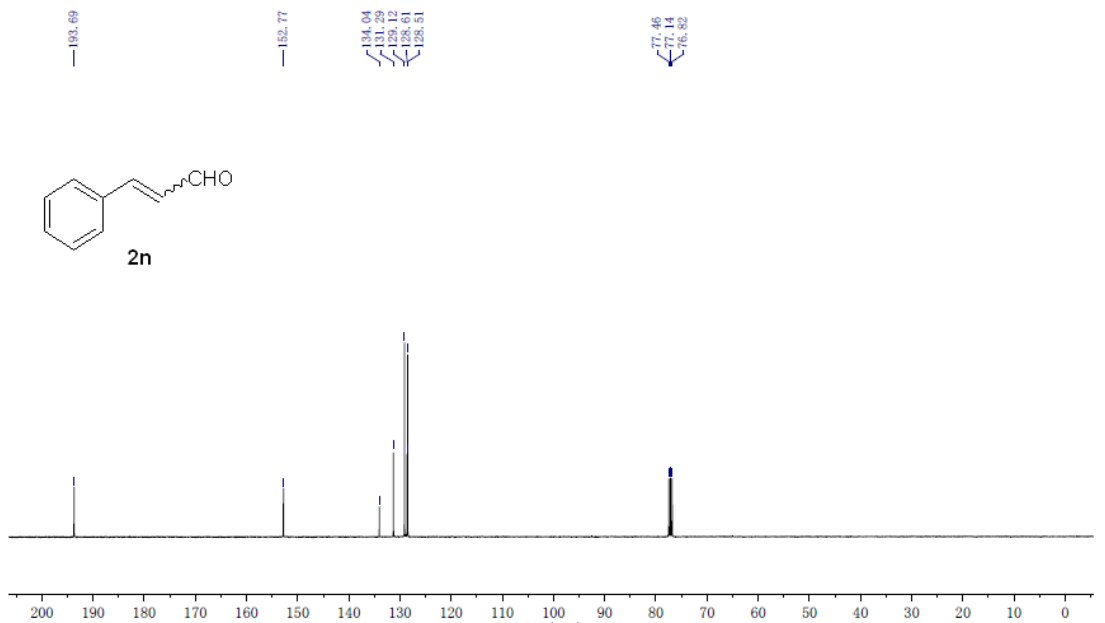

Supplement: c4ra14152k1.pdf [file c4ra14152k1.pdf]
